# Supplementary material for: Plant breeding can be made more efficient by having fewer, better crosses
Source: PubMed Central journal article supplement (PMC3621587; doi:10.1186/1471-2229-13-22), 2013-02-07
Supplement: 1471-2229-13-22-S6.pdf [file 1471-2229-13-22-S6.pdf]

**A proposal for the release of an aromatic rice variety Suanulo Sugandha**  
(A rice variety developed using client-oriented breeding (COB) approaches)

Jointly Submitted by

Local Initiatives for Biodiversity, Research and Development (LI-BIRD)

CAZS-Natural Resources (CAZS-NR), Bangor University, Bangor, UK

National Rice Research Programme (NRRP), Hardinath, Dhanusha, Nepal

Jaskelo Youth Club (JYC), Chitwan

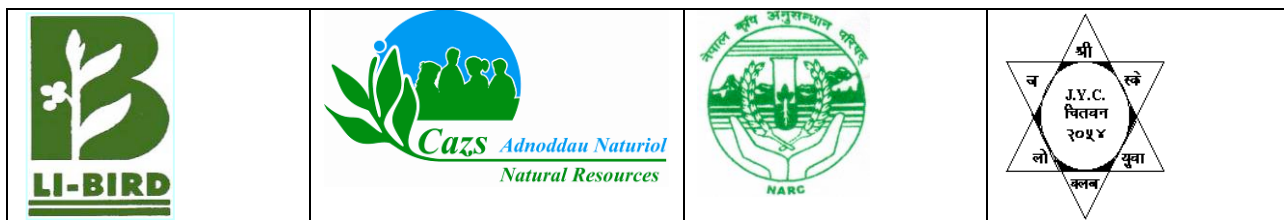

J. R. Witcombe<sup>†</sup>, K. P. Devkota<sup>§</sup>, M. P. Tripathi<sup>§</sup>, S. Gyawali<sup>§</sup>, M Subedi<sup>§</sup>, P. K. Shrestha<sup>§</sup>, B. N. Chaudhary<sup>‡</sup>, R. B. Yadav<sup>‡</sup>, M. Yadav<sup>‡</sup>, D. Chaudhary<sup>‡</sup>, A.P. Gautam<sup>‡</sup>, T. Akhtar<sup>‡</sup>, S. P. Khatiwada<sup>‡</sup>, N P Adhikari<sup>‡</sup>, K. Chapagain<sup>¶</sup> and K. D. Joshi<sup>‡§</sup>

<sup>§</sup>Local Initiatives for Biodiversity, Research and Development (LI-BIRD)

<sup>†</sup>CAZS-Natural Resources, Bangor University, UK

<sup>‡</sup>National Rice Research Programme (NRRP), Nepal Agricultural Research council (NARC)  
Hardinath, Dhanusha, Nepal

<sup>¶</sup>Jaskelo Youth Club (JYC), Chitwan

January 2008

## Application to be made for approval and release of crop varieties

Government of Nepal  
Ministry of Agriculture and Cooperatives  
National Seed Board  
Format for submission of proposal for the release of a crop variety

The Variety Approval, Release and Registration Sub-committee (VARRC)  
National Seed Board Secretariat  
Seed Quality Control Centre  
Harihar Bhawan, Lalitpur  
Tel. 977-01-5521359

### **Sub: Application for the release of a rice variety Sunaulo Sugandha**

As, we have selected new aromatic rice variety described below; we hereby make this application for the release of the seeds of rice variety as follows.

| <b>Original entry name</b>              | <b>Suggested name</b> |
|-----------------------------------------|-----------------------|
| LIRI-BAS-77 (Plot # 65-1) Sugandha 2002 | Sunaulo Sugandha      |

### **1. Background information**

Rice (*Oryza sativa* L.) is the most important commodity in Nepalese agriculture and its economy as it is grown in about 1.55 m ha producing 4.3 m tons of rough rice with an average productivity of 2.8 t ha<sup>-1</sup>. Share of rice is 20% to the agricultural Gross Domestic Product (GDP) and it contributes nearly 50% to the total calorie requirement of Nepalese people (CBS, 2003).

*Basmati* (aromatic) rice is a group of rice varieties that emit aroma on cooking and are considered very high quality rice. Most consumers in South Asia prefer long grain (length 6-7.5 mm), slender (2.5-3 length/breadth ratio), translucent, soft and aromatic grains. *Basmati* have superior eating quality with softness of cooked rice, remarkable expansion on cooking and pleasant aroma. These are grown in special niches of the terai, inner terai, valleys and foot hills of Nepal. Of these, Jetho Budho grown in Pokhara valley is most preferred, while *Seto* (white) and *Rato* (red) *Basmati* and *Kala Namak* are other preferred rice varieties grown in the terai. Jarneli and Pokhrela Masino, although, do not have aroma but are popular fine quality rice landraces (Joshi et al., 1997). Aromatic and fine grain rice landraces are photosensitive late maturing but with low yield potential, tall, non-responsive to nitrogenous fertilizers and prone to lodging. Some of these are also susceptible to rice diseases, e.g. blast. Although, there have been some efforts over last two decades to improve fine and aromatic rice through introduction and testing and also through landrace enhancement, but no modern aromatic rice variety has been released so far in the country. Introduced fine grain and aromatic varieties have had limited success. A stakeholders' analysis revealed that low net return from existing aromatic and fine rice landraces due to low productivity was the major reason farmers not being very enthusiastic to expand area under fine and aromatic landraces (Sah, 2002).

Nepal used to export about 200 tonne of fine quality *Basmati* rice per annum earning 41 million rupees at 1977 price (Giri and Shahi, 1978) but due to population growth, Nepal stopped exporting rice. Production of aromatic and fine rice even today is limited in the country and with the improvement in the living conditions of the people, there is an increasing demand for better quality rice. It is assumed that major proportion of this is met by import from India, although, there is a lack of data on import and export of aromatic rice in the country.

It is estimated that aromatic and fine rice in Nepal may occupy around 10% of the total rice area i.e. 150, 000 ha (Sah, 2002). A postal survey and rapid rural appraisal conducted in Nepal during mid-1990s indicated a potential for over 30% increase in the area under aromatic rice if suitable technologies are available (Joshi et al., 1997). It was also found that over 60% cases the grain is used both for consumption and sale. The premium price for indigenous aromatic and fine quality rice varieties ranged from Rs. 2 to 20 per kg extra at 1997 price (2-30 cents) (Joshi et al., 1997).

Sunaulo Sugandha was bred using Client-Oriented Breeding (COB)<sup>1</sup>. Several professionals from many organizations and farmers contributed in the development of Sunaulo Sugandha (Annexure 1). The details of the breeding procedures employed for the development of Sunaulo Sugandha are presented in Table 1. This involved screening large irradiated population of Pusa Basmati 1 that had outcrossed to other unknown parents. The selection focussed on identifying best aromatic and high grain quality rice lines under farmers' customary management and input levels and biotic and abiotic conditions of target population of environment (TPE) with active involvement of farmers. This proposal summarises the performance of Sunaulo Sugandha from a number of trials.

A comprehensive participatory evaluation for quality traits was done before advancing rice lines from this cross to any on-station or on-farm evaluation. This included assessment for physical qualities, e.g. aroma, qualities of unmilled and milled rice, cooking and eating qualities. The disease screening and yield testing of the rice lines was done by NRRP. A summary of all the trials with Sunaulo Sugandha as one of the test entries by NRRP and NARC research stations, LI-BIRD and DADO network are summarised in Table 2.

## **2. General Information**

- 2.1. Common name: Rice
- 2.2. Botanical name: *Oryza sativa* L.
- 2.3. Original designation/Symbolic name used in testing: Sugandha 2002 subsequently evaluated as Sunaulo Sugandha in all the trials.
- 2.4. Pedigree/selection history: (Please see Table 1) below

---

<sup>1</sup> COB, previously known as participatory plant breeding (PPB) was implemented by LI-BIRD with technical support from CAZS Natural Resources (CAZS-NR), Bangor University, UK and in collaboration with National Rice Research Programme (NRRP), NARC, Jaskelo Yuba Club, Chitwan, District Agricultural Development Offices (DADOs) and the farming community of Chitwan and many other districts in Nepal. Department for International Development (DFID) Plant Sciences Research Programme (PSP) provided the financial support for COB

**Table 1.** Summary of breeding procedures of Sunaulo Sugandha, 1998-2007

| Year | Season        | Procedure                                                                                                                                                                                            |
|------|---------------|------------------------------------------------------------------------------------------------------------------------------------------------------------------------------------------------------|
| 1998 | Winter        | Pusa Basmati 1 treated by Y-rays (done in the UK arranged by CAZS-NR).                                                                                                                               |
| 1998 | Main          | Grown bulk seeds in 700 m <sup>2</sup> area and harvested selected 97 M <sub>1</sub> families having taller awnless and disease free plants. Farmers were involved in the selection process.         |
| 1999 | <i>Chaite</i> | Grown individual families and selected 53 individual plants including LIRI-BAS-77 (Plot # 65-1).                                                                                                     |
| 1999 | Main          | Modified bulk harvesting after roguing                                                                                                                                                               |
| 2000 | Main          | Bulk harvested after roguing                                                                                                                                                                         |
| 2001 | Main          | Bulk harvested after roguing                                                                                                                                                                         |
| 2002 | Main          | Plot # 65 was grown in 10m <sup>2</sup> area with roguing                                                                                                                                            |
| 2003 | Main          | Disease screening nurseries at NRRP; organoleptic assessment in Chitwan by stakeholders                                                                                                              |
| 2004 | Main          | Disease screening nurseries at NRRP, CVT in RLM trial, Mother and Baby trials (LI-BIRD and other NGOs and DADOs across terai), organoleptic by stakeholders                                          |
| 2005 | Main          | Panicle selection for breeder seed production from 59 best hills from about 8000 IET and disease screening nurseries at NRRP and, Mother and Baby trials (LI-BIRD and NGOs and DADOs across terai) . |
| 2006 | Main          | Disease screening nurseries at NRRP, CVT in RLM, Mother and Baby trials (LI-BIRD and other NGOs and DADOs)                                                                                           |
| 2007 | Main          | Mother and Baby trials (LI-BIRD, other NGOs and DADOs), seed production.                                                                                                                             |

- 2.5. Cross (parents)<sup>2</sup> Irradiation of Pusa Basmati-1 with gamma radiation at University of Nottingham arranged by CAZS-Natural Resources. However, this population was subsequently determined to have outcrossed to other unknown parents.
- 2.6. Country of Origin: Nepal
- 2.7. Source of material (Name of the institution, farmer/farming community, experiment and the year in which it was first introduced, etc): Irradiated seeds of Pusa Basmati 1 introduced from CAZS-NR, Bangor University, UK by LI-BIRD in 1998 and the entire breeding was done in Chitwan, Nepal.
- 2.8. Years and location of testing of the varieties in Nepal (see Table 2)

<sup>2</sup> Cross (parents) may not be applicable to landraces while for the hybrids, the proposing Company may or may not disclose the parentage

**Table 2.** Summary of years and locations of testing Sunaulo Sugandha in Nepal

| Year         | Experiment                                                                                                                                                              | Location                                                                                            | Source/<br>References <sup>3</sup> |
|--------------|-------------------------------------------------------------------------------------------------------------------------------------------------------------------------|-----------------------------------------------------------------------------------------------------|------------------------------------|
| 2004 & 2006  | Coordinated varietal trial rainfed lowland medium (CVT RLM)                                                                                                             | NRRP, Hardinath, RARS Parwanipur                                                                    | Annexure 2                         |
| 2004 to 2006 | Yield (t ha <sup>-1</sup> ) performance of Sunaulo Sugandha in Mother trials in low land environment of Chitwan and Nawalparasi                                         | Chitwan and Nawalparasi                                                                             | Annexure 3                         |
| 2006         | Yield (t ha <sup>-1</sup> ) performance of Sunaulo Sugandha in aromatic Mother trials in Chitwan and Nawalparasi                                                        | Chitwan                                                                                             | Annexure 4                         |
| 2004 to 2006 | Agronomic traits of Sunaulo Sugandha and other main season rice varieties in CVT and Mother trials rainfed lowland medium (RLM)                                         | Hardinath, Parwanipur, Jhapa, Morang, Sunsari, Saptari, Siraha, Chitwan, Nawalparasi and Kapilvastu | Annexure 5                         |
| 2006         | Grain yield (t ha <sup>-1</sup> ) of Sunaulo Sugandha from crop cut survey of Baby trials from various districts of Nepal                                               | Chitwan, Makwanpur, Rupandehi, Mahottari, Morang, Lamjung, Tanahun and Udaypur                      | Annexure 6                         |
| 2006         | Various rice varieties being replaced by Sunaulo Sugandha in 8 districts (as mentioned in Annexure 6) of Nepal.                                                         | Chitwan, Makwanpur, Rupandehi, Mahottari, Morang, Lamjung, Tanahun and Udaypur                      | Annexure 7                         |
| 2004 to 2006 | Cost-benefit analysis of Sunaulo Sugandha and Masuli Based on CVT, Mother and Baby trials                                                                               | Various districts                                                                                   | Annexure 8                         |
| 2003-2006    | Disease data from National Bacterial Leaf Blight Screening Nursery and National Blast Screening Nurseries, other studies done at IAAS and LI-BIRD                       | NRRP, Hardinath, LI-BIRD Chitwan and Nawalparasi, IAAS, Rampur                                      | Annexure 9-11                      |
| 2003         | Response of Sunaulo Sugandha and Masuli to rice insects observed in mother trials in on-farm trials in Chitwan district by plant pathologist from IAAS, Rampur, Chitwan | IAAS, Rampur                                                                                        | Annexure 12                        |

*Performance in Coordinated Varietal trials:*

**Table 3.** Regression parameters of Sunaulo Sugandha and Masuli in rainfed lowland medium trials from CVT (n=11) and mother trial (n=25) where variety mean grain yield was regressed on trial mean yield of the test entry and Masuli from 2004 to 2007

| Variety          | Mean grain yield (t/ha) | b    | SE of b   | R <sup>2</sup> (%) | Range (t/ha) |
|------------------|-------------------------|------|-----------|--------------------|--------------|
| Masuli           | 2.89 ± 0.145            | 1.02 | 0.1334*** | 63                 | 1.39 – 4.91  |
| Sunaulo Sugandha | 3.05 ± 0.144            | 0.92 | 0.1517*** | 50                 | 1.38 - 5.78  |

Sunaulo Sugandha is suitable from medium to low lands with rainfed to irrigated conditions having a potential of covering over 0.3 million ha from the terai to the river basins. It has exceptional combination of high yield potential, e.g. > 4 t ha<sup>-1</sup> under farmers' management (which is not very common with high quality rice varieties), good aroma and excellent eating quality. It is non-lodging, responsive to applied nitrogenous fertilizers and has all the yield

<sup>3</sup> Details of experimental results have been presented at the end of the report and only Annexure numbers have been referred here.

components to support high yield. Because of good aroma and excellent eating quality, farm gate price of unmilled Sunalo Sugandha rice is Rs. 18 kg<sup>-1</sup> which is 33% more than the price of Masuli, a most popular rice variety among Nepalese consumers. Remarkable thing about Sunalo Sugandha is that it offers two fold advantages; higher yield and premium price thus nearly trebling the total returns to farmers compared to Masuli.

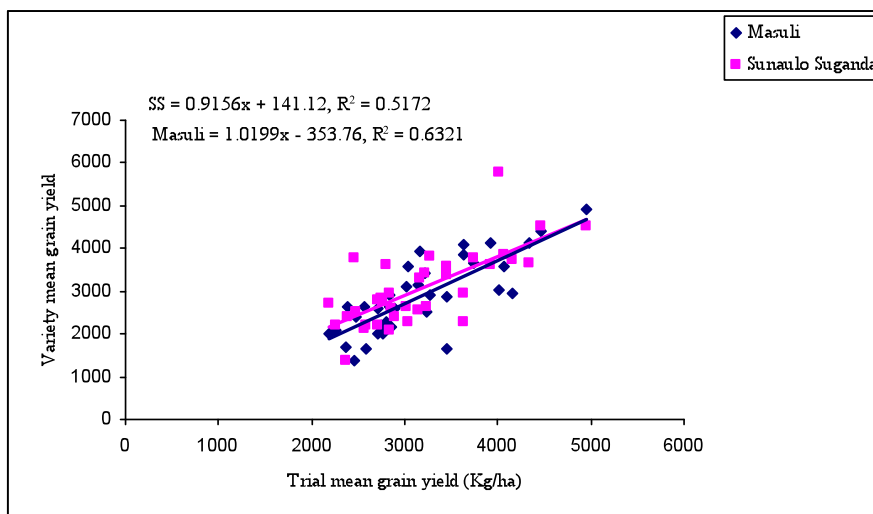

**Figure 1.** Stability (joint regression analysis) of Sunalo Sugandha over standard check variety Masuli in CVT (n=11) and mother trials (n=25) from 2004 to 2007 in Chitwan, Nawalparasi, Bara and Dhanusha, districts of Nepal

*Mother trials:*

2.9. Farmers Field Trials (FFT), participatory trials data/information and stakeholders<sup>4</sup> preferences and major traits<sup>5</sup> of stakeholders' interest

**Table 4.** Summary of years and locations of testing Sunalo Sugandha in Baby trials, participatory rice quality assessment and organoleptic assessment in Nepal

| Year         | Experiments/trials                                                                 | Location                                                                                                                                                                                        | Source<br>References |
|--------------|------------------------------------------------------------------------------------|-------------------------------------------------------------------------------------------------------------------------------------------------------------------------------------------------|----------------------|
| 2005<br>2006 | Paired comparison of rice genotypes in Baby trials                                 | Jhapa, Morang, Sunsari, Saptari, Shirha, Dhanusha, Mahottari, Sarlahi, Rautahat, Bara, Parsa, Makwanpur, Chitwan, Nawalparasi, Rupandehi, Kapilvastu, Dang, Banke, Bardiya, Kailali, Kanchanpur | Table 4              |
| 2003<br>2004 | Participatory rice quality assessment (physical, milled and cooked rice qualities) | Chitwan                                                                                                                                                                                         | Table 9              |

<sup>3</sup> Stakeholders refer to farmers, consumers, processing industry, merchants, and seed companies/Agrovets.

<sup>4</sup>Major traits of stakeholders' interest include (1) agronomic data (2) Stress tolerance (3) quality traits (4) Economic value (5) Others specify if any. Please attach the details of experimental results at the end and refer only Annexure numbers here.

*Performance in Baby trial*

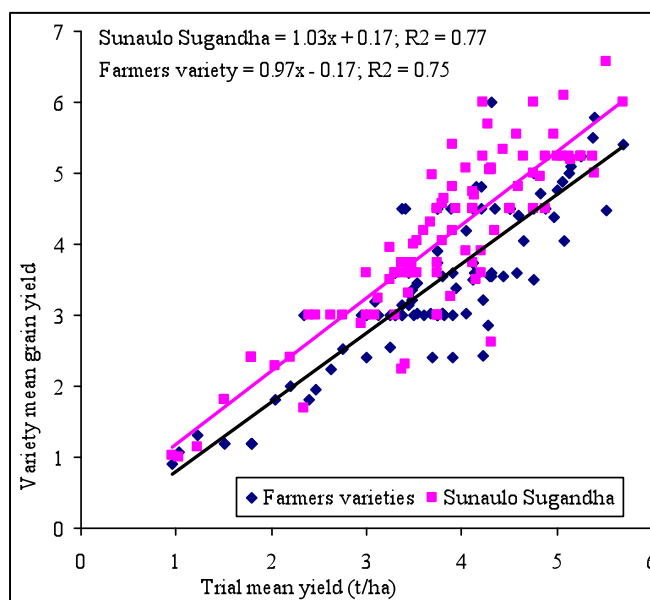

**Figure 2.** Stability (joint regression analysis) of Sunaulo Sugandha over farmers variety from Baby trial crop cut data (n=101) in 2006 from Chitwan (52), Makawanpur (7), Rupandehi (3), Mahottari (3), Morang (9), Lamjung (15), Tanahun (2) and Udayapur (10) districts of Nepal

**Table 5.** Grain yield of Sunaulo Sugandha from crop cut survey from Baby trials in 5 terai districts and 3 hilly districts, 2006

| Region‡       | N   | Farmers' varieties‡ (t ha <sup>-1</sup> )§ | Sunaulo Sugandha (t ha <sup>-1</sup> )§ | Yield advantage over farmers' varieties (%) | t at 0.05 |
|---------------|-----|--------------------------------------------|-----------------------------------------|---------------------------------------------|-----------|
| Eastern Terai | 12  | 3.56±0.19                                  | 4.30±0.27                               | 21.0                                        | *         |
| Central Terai | 62  | 3.80±0.15                                  | 4.09±0.16                               | 7.5                                         | *         |
| Hilly area    | 27  | 2.74±0.19                                  | 3.77±0.25                               | 38.0                                        | ***       |
| Overall mean  | 101 | 3.55±0.20                                  | 4.09±0.12                               | 15.0                                        | ***       |

‡ See Annexure 6 for details of locations and farmers' varieties

§Mean ± SE,

The performance of Sunaulo Sugandha was compared to the yield of the best available aromatic varieties in some of the Mother trials (Annexure 4). Sunaulo Sugandha yielded more than 1.5 t ha<sup>-1</sup> than these aromatic landraces while having better BLB resistance and lodging resistance.

### 2.10 Farmers' perceptions and preferences:

Summary of farmers preferences for Sunaulo Sugandha (SS) have been presented in Table 6 Based on results from 32 baby trials conducted in 2005 and 160 Baby trials in 2006 in several districts of Nepal, Sunaulo Sugandha was preferred variety for its excellent eating quality with aroma, higher market price and higher grain yield with higher milling recovery than the farmer's popular varieties. Higher tillering, lodging tolerance, easy threshing are other desirable traits (Table 6). Willingness of over 80% respondents in both the years to continue growing this variety indicates its very high preference as it was also highly rated for overall performance (Table 6).

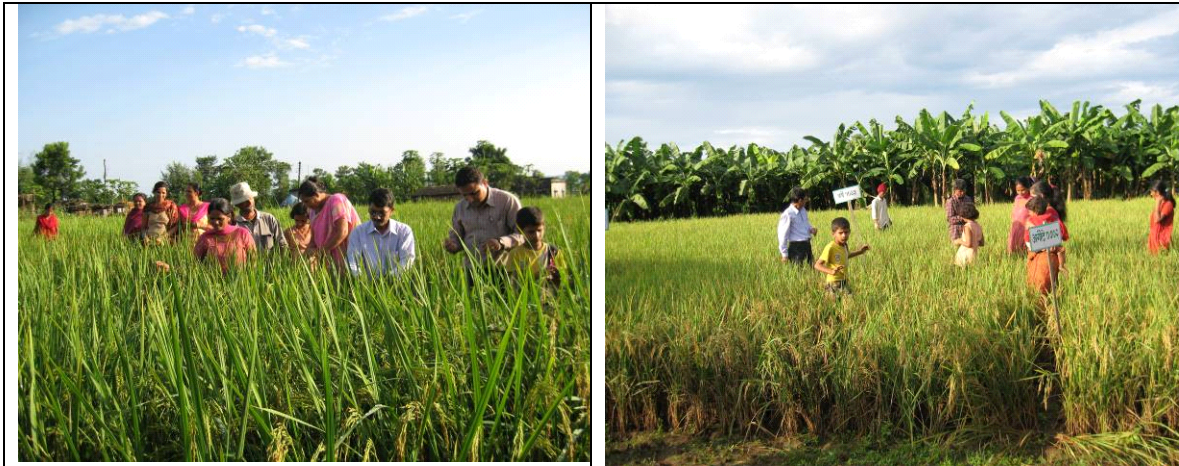

Farmers evaluating Sunaulo Sugandha (left) and preference ranking at a Mother Trial (right)

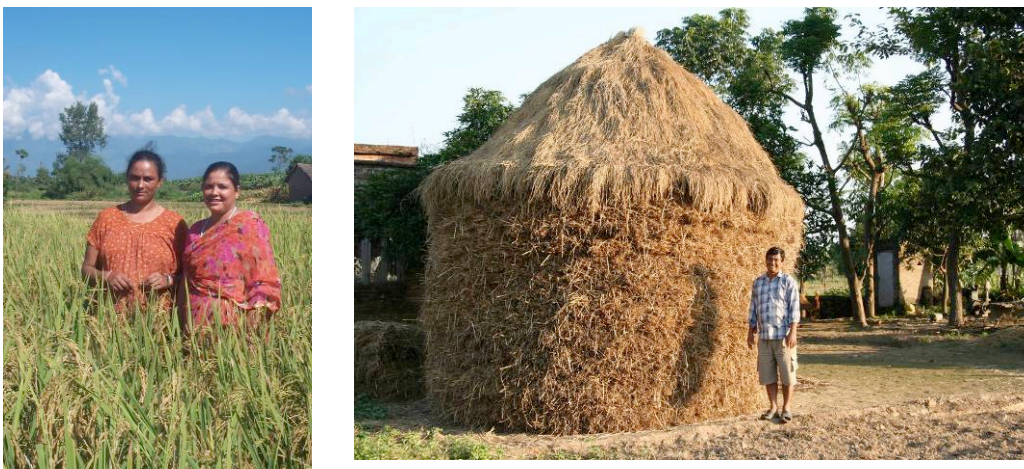

Sunaulo Sugandha near maturity (left) and Stack of harvested Sunalulo Sugandha (right)



**Table 6.** Farmers' perceptions from 32 Baby trials from seven districts in 2005 and 160 baby trials from 14 districts of Nepal, 2006‡

| Trait               | 2005 |                                 |              | 2006 |                                 |              |
|---------------------|------|---------------------------------|--------------|------|---------------------------------|--------------|
|                     | N    | Preferring Sunaulo Sugandha (%) | Significance | N    | Preferring Sunaulo Sugandha (%) | Significance |
| Maturity            | 30   | 30                              | 0.439ns      | 145  | 21                              | 0.001***     |
| Tillering capacity  | 31   | 39                              | 0.020*       | 152  | 55                              | 0.000***     |
| Lodging             | 30   | 17                              | 0.000**      | 145  | 87                              | 0.000***     |
| Disease             | 32   | 50                              | 0.102ns      | 154  | 33                              | 0.345ns      |
| Threshing           | 32   | 53                              | 0.001**      | 142  | 51                              | 0.000***     |
| Milling recovery    | 32   | 44                              | 0.008**      | 136  | 38                              | 0.08ns       |
| Eating quality      | 32   | 84                              | 0.000**      | 138  | 88                              | 0.000***     |
| Market price        | 22   | 41                              | 0.011*       | 126  | 77                              | 0.000***     |
| Straw yield         | 32   | 41                              | 0.275ns      | 154  | 50                              | 0.000***     |
| Grain yield         | 32   | 47                              | 0.005*       | 142  | 55                              | 0.000***     |
| Will grow again     | 29   | 86                              | 0.002***     | 142  | 84                              | 0.000***     |
| Overall performance | 30   | 83                              | 0.000***     | 148  | 78                              | 0.000***     |

‡ In 2005 Baby trials were conducted, with number in the parenthesis represents number of trials, in: Kailali (2), Kanchanpur (1), Makawanpur (10), Morang (2), Saptari (3), Siraha (5) and Sunsari (9)] while in 2006 baby trials were conducted in Bara (1), Chitwan (57), Jhapa (6), Lamjung (20), Mahottari (9), Makawanpur (8), Morang (23), Nawalparasi (2), Rupandehi (10), Parsa (3), Tanahun (5), Syangja (1), Sunsari (2), Udaypur (13).

### Stakeholder's perceptions

Farmer's perception about Sunaulo Sugandha were received from seven districts Kailali, Kanchanpur, Makwanpur, Morang, Saptari, Siraha and Sunsari districts in main season 2005.

### Preferred traits

1. Aromatic and fine grains
2. High grain and straw yields
3. Long Panicle
4. High milling percentage
5. Good eating quality
6. Fertilizer responsive
7. Non-lodging

### 3. Summary of Varietal Characteristics

#### 3.1. Agronomic<sup>6</sup>

Agronomic data are summarised from three years' averages from CVT trials except for 3.1.4 which is the mean of all the trials in which yield was measured from CVT, Mother trials and crop cut of Baby trials (Table 7). Overall, yield advantage of Sunaulo Sugandha over Masuli is 13% considering the results of CVT, Mother and Baby trials (n=137) from various districts of Nepal.

**Table 7.** Agronomic performance of Sunaulo Sugandha relative to Masuli based on the CVT, Mother trial and Baby trial combined mean data from 2004 to 2006

| S. No.        | Characteristics‡                      | Sunaulo Sugandha | Masuli    |
|---------------|---------------------------------------|------------------|-----------|
| <b>3.1.1.</b> | <b>Morphological traits</b>           |                  |           |
| 3.1.1.1       | Plant height (cm)                     | 105±1.3          | 117±1.4   |
| 3.1.1.2       | Days to maturity                      | 151±1.0          | 151±1.6   |
| <b>3.1.2</b>  | <b>Yield components</b>               |                  |           |
| 3.1.2.1       | Yield (t ha <sup>-1</sup> ) (n = 137) | 3.82±1.2         | 3.38±1.1  |
| 3.1.2.2       | Yield range (t ha <sup>-1</sup> )     | 1.38-5.77        | 1.39-4.90 |
| 3.1.2.3       | Panicle m <sup>2</sup> (Number)       | 272±5.3          | 260±8.3   |
| 3.1.2.4       | Panicle length (cm)                   | 27±0.4           | 23±0.4    |
| 3.1.2.5       | Number of grains per panicles         | 141±13.9         | 136±77.1  |
| 3.1.2.6       | 1000 rough rice grain weight (g)      | 19±0.4           | 18±0.8    |
| 3.1.2.7       | 1000 milled rice grain weight (g)     | 14.75            |           |

*Nutrient responsiveness:* From case studies of Hari Khadka, Shankar Bhatta and other farmers

#### 3.2. Response to stresses:

##### 3.2.1 Biotic stresses

- (a) *Diseases:* Sunaulo Sugandha has field tolerance to blast as the disease scores recorded in all the National Blast Screening Nurseries from 2003 to 2006 it never scored more than 4 in a scale of 0-9 (Table 8, Annexure 9-11). Remarkable thing about the reaction of Sunaulo Sugandha to BLB is that although, in artificially inoculated trials it scored between 5 to 7 in a 0-9 scale (Table 8), but in spite of that its yield performance was extremely good, which indicated its field tolerance. A comparison of Sunaulo Sugandha with other aromatic rice varieties and landraces for BLB revealed that its BLB scores were similar to other popular aromatic varieties except Pusa Sugandha-2 which is a released variety in India (Table 9), again the its yield level is much higher than the Indian aromatic varieties. It is very well acknowledged fact that BLB is a severe constraint in aromatic rice production. All the existing aromatic varieties are highly susceptible

<sup>6</sup> These traits may vary depending up on the crop species

and the disease is prevalent in the entire aromatic growing regions (Joseph et al., 2004).

**Table 8.** Summary of blast scores from 2003 to 2006

| Variety                                  | Blast scores (0-9) |      |      |      | Maximum Score (0-9)<br>In those set of trials |
|------------------------------------------|--------------------|------|------|------|-----------------------------------------------|
|                                          | 2003               | 2004 | 2005 | 2006 |                                               |
| Sunaulo Sugandha                         | 0                  | 0    | 0    | 4    | 4                                             |
| Resistant check (Laxmi)                  |                    | 3    | 0    | 0    | 3                                             |
| Susceptible Check<br>(Masuli/Sankharika) |                    | 9    | 8    | 7.5  | 9                                             |
| Maximum score recorded (0-9)             | 4                  | 9    | 8    | 8    | 9                                             |

Source: NRRP unpublished data 2003 to 2006

<sup>§</sup> Leaf and neck blast scoring was done using IRRI Standard Evaluation System (SES) for rice in 0-9 scale, mean of three replicates. For blast on the basis of severity of infection on panicle, 0 = no incidence, 0 = no lesions 3= Significant number of roundish to slightly elongated necrotic grey spots about 1-2 mm in diameter with a distinct brown margin 5= Typical blast lesions infecting 4-10% of leaf area, 7= Typical blast lesions infecting 26-50% of leaf area, 9= Typical blast lesions infecting >75% of leaf area

**Table 9.** Summary of BLB scores of aromatic rice varieties from 2003 to 2006

| Variety                      | BLB scores (0-9) |      |      |      | Maximum Score (0-9)<br>In those set of trials |
|------------------------------|------------------|------|------|------|-----------------------------------------------|
|                              | 2003             | 2004 | 2005 | 2006 |                                               |
| Sunaulo Sugandha             | 7                | 5    | 7    | 7    | 7                                             |
| Rato Basmati                 |                  | 5    |      |      |                                               |
| Sugandha 2-2                 |                  | 7    |      |      |                                               |
| Sugandha 3-1                 |                  | 7    |      |      |                                               |
| Pusa Sugandha-2              |                  | 9    |      |      |                                               |
| Basmati 101                  |                  |      |      | 5    |                                               |
| Resistant check (Laxmi)      |                  | 3    | 3    | 3    | 3                                             |
| Susceptible check (TN1)      |                  | 7    | 9    | 9    | 9                                             |
| Maximum score recorded (0-9) | 7                | 7    | 9    | 9    | 9                                             |

Source: NRRP unpublished data 2003 to 2006, BLB= Bacterial leaf blight

Where 0 = no lesions 3= Significant number of small brown specks of pin-point size or large brown specks without sporulating centre 5= Typical BLB lesions infecting 4-10% of leaf area 7= Typical BLB lesions infecting 26-50% of leaf area 9= Typical BLB lesions infecting >75% of leaf area

**Table 10.** Summary of insect scores for Sunaulo Sugandha at NRRP in 2005

| Varieties                 | Brown plant hopper<br>(BPH) | Stem borer<br>(dead heart) | Stem borer<br>(white head) |
|---------------------------|-----------------------------|----------------------------|----------------------------|
| Sunaulo Sugandha          | MS <sup>†</sup>             | R                          | MR                         |
| TN 1 (susceptible check)  | HS                          | MS                         | MS                         |
| Sabitri (Resistant check) | MR                          | R                          | R                          |

<sup>†</sup>MS = moderately susceptible, HS= highly susceptible, MR=moderately resistant, R= resistant

Source: P. Thakur, NRRP; unpublished data 2005

(b) *Weeds*: None of the specific weed problems were associated with this variety.

### 3.2.2 Abiotic stresses

For best results this variety should not be exposed to drought stress from booting to maturity.

### 3.3 Quality of economically important parts of the crop

#### 3.3.1 Nutritional quality:

**Table 11.** Nutritional quality of selected rice varieties, 2006

| Samples           | Percentage of parameters |     |         |              |                |                   | Energy<br>Kcal/<br>100g | Zinc<br>(ppm) | Iron<br>(ppm) |
|-------------------|--------------------------|-----|---------|--------------|----------------|-------------------|-------------------------|---------------|---------------|
|                   | Mois-<br>ture            | Fat | Protein | Total<br>Ash | Crude<br>Fibre | Carbo-<br>Hydrate |                         |               |               |
| Sunaulo Sugandha  | 14.3                     | 2.5 | 9.8     | 6.4          | 12.8           | 69                | 336                     | 13            | 83            |
| CNTRLR            | 13.0                     | 2.1 | 7.8     | 3.1          | 13.3           | 74                | 345                     | 25            | 203           |
| Sugandha 1        | 13.5                     | 2.1 | 7.3     | 3.2          | 11.7           | 76                | 351                     | 15            | 83            |
| Masuli            | 11.9                     | 2.3 | 10.1    | 3.1          | 12.3           | 72                | 350                     | 22            | 213           |
| Ram (OR367)       | 13.2                     | 2.5 | 9.7     | 6.8          | 11.4           | 70                | 340                     | 19            | 410           |
| Sabitri           | 12.1                     | 2.5 | 9.7     | 4.4          | 11.0           | 72                | 351                     | 15            | 129           |
| Barkhe 3004       | 13.4                     | 2.2 | 10.9    | 5.2          | 11.9           | 70                | 343                     | 18            | 77            |
| Mithila (BPI-3-2) | 12.1                     | 2.1 | 9.4     | 5.9          | 12.5           | 70                | 337                     | 13            | 153           |
| Kanchhi Masuli    | 13.0                     | 2.1 | 9.2     | 4.7          | 10.7           | 73                | 349                     | 16            | 62            |
| Radha 4           | 11.5                     | 2.1 | 8.8     | 3.2          | 10.2           | 76                | 357                     | 17            | 145           |

Source: LI-BIRD unpublished data, 2006

#### 3.3.2 Processing quality:

##### Un-milled rice

**Table 12.** Participatory visual assessment of grain quality of new and popular rice varieties of Nepal Chitwan in 2003 and 2004.

| Variety           | Husk colour         | Grain type     |                | Rice<br>grade |
|-------------------|---------------------|----------------|----------------|---------------|
|                   |                     | Width          | Length         |               |
| Sunaulo Sugandha  | Dull brown          | Fine           | Medium         | Good          |
| CNTRLR            | Straw               | Bold           | Long           | Good          |
| Pusa 834          | Straw               | Bold           | Long           | Fair          |
| Masuli            | Golden              | Medium fine    | Medium         | Excellent     |
| Sabitri           | Straw               | Medium         | Medium         | Good          |
| Mithila (BPI 3-2) | Lighter than Masuli | Same as Masuli | Same as Masuli | Good          |
| Swarna            | Like Masuli         | Medium         | Short          | Fair          |
| Radha 4           | Straw               | Bold           | Short          | Poor          |

### Milled rice

Table 13. Participatory visual assessment of grain quality of new and popular rice varieties of Nepal Chitwan in 2003 and 2004.

| Variety           | Length | Width       | Colour     | Grain Breakage  | Grading rice for the quality of <i>bhat</i> | White belly          | Remarks       |
|-------------------|--------|-------------|------------|-----------------|---------------------------------------------|----------------------|---------------|
| Sunaulo Sugandha  | Long   | Medium      | Ghee white | Slightly broken | Excellent                                   | Translucent          | Aroma present |
| CNTRLR            | Long   | Medium fine | Ghee       | Not broken      | Excellent                                   | Translucent          | Special aroma |
| Pusa Basmati-1    | long   | Fine        | Ghee       | Few broken      | Excellent                                   | Translucent          | Aroma         |
| Masuli            | Medium | Medium fine | Ghee       | Not broken      | Excellent                                   | Translucent          |               |
| Sabitri           | Medium | Medium      | Ghee       | Not broken      | Excellent                                   | Translucent          |               |
| Mithila (BPI 3-2) | Medium | Medium fine | Ghee white | Not broken      | Good                                        | <10% area of grain   |               |
| Swarna            | Medium | Medium      | White ghee | Not broken      | Good                                        | <10% area of grain   |               |
| Kanchhi Masuli    | Short  | Bold        | Ghee       | Slightly broken | Poor                                        | 11-20% area of grain |               |
| Radha 4           | Short  | Bold        | White      | Slightly broken | Poor                                        | 11-20% area of grain |               |

### 3.3.3 Organoleptic test (cooking quality, taste, aroma/flavour, etc):

#### Cooked rice

Table 14.a. Organoleptic assessment of cooked rice of new rice and popular rice varieties of Nepal Chitwan in 2003 and 2004

| Variety           | Softness | Flakiness | Taste  | Water Absorption | Inner Hardiness | Remarks |
|-------------------|----------|-----------|--------|------------------|-----------------|---------|
| Sunaulo Sugandha  | Medium   | Good      | Tasty  | High             | Absent          | Aroma   |
| CNTRLR            | Soft     | Good      | Tasty  | High             | Absent          | Aroma   |
| Pusa Basmati-1    | Soft     | Good      | Tasty  | High             | Absent          | Aroma   |
| Masuli            | Soft     | Good      | Tasty  | Medium           | Absent          |         |
| Sabitri           | Medium   | Good      | Medium | High             | Present         |         |
| Mithila (BPI 3-2) | Medium   | Good      | Testy  | Medium           | Absent          |         |
| Kanchhi Masuli    | Medium   | Medium    | Low    | High             | Present         |         |
| Swarna            | Medium   | Medium    | Medium | Low              | Absent          |         |

Table 14.b. Post harvest evaluation of rough paddy, milled rice and cooked rice along with popular rice varieties in Chitwan during 2007

| SN       | Genotypes               | Rough paddy  |              |              | Milled rice  |              |              | Cooked rice  |              |              |
|----------|-------------------------|--------------|--------------|--------------|--------------|--------------|--------------|--------------|--------------|--------------|
|          |                         | Length       | Breath       | L/B          | Length       | Breath       | L/B          | Length       | Breath       | L/B          |
| 1        | Sabitri                 | 0.762        | 0.177        | 4.311        | 0.572        | 0.162        | 3.536        | 0.920        | 0.234        | 3.932        |
| 2        | Pusa Basmati 1          | 1.120        | 0.178        | 6.280        | 0.730        | 0.152        | 4.813        | 1.196        | 0.216        | 5.537        |
| 3        | Masuli                  | 0.792        | 0.177        | 4.481        | 0.507        | 0.145        | 3.494        | 0.916        | 0.248        | 3.694        |
| <b>4</b> | <b>Sunaulo Sugandha</b> | <b>0.975</b> | <b>0.172</b> | <b>5.680</b> | <b>0.683</b> | <b>0.158</b> | <b>4.316</b> | <b>1.132</b> | <b>0.214</b> | <b>5.290</b> |
| 5        | Lalka Basmati           | 0.842        | 0.183        | 4.591        | 0.605        | 0.165        | 3.667        | 0.922        | 0.238        | 3.874        |
| 6        | Kanchhi Masuli          | 0.728        | 0.188        | 3.867        | 0.517        | 0.163        | 3.163        | 0.686        | 0.260        | 2.638        |
| 7        | Swarna                  | 0.763        | 0.180        | 4.241        | 0.553        | 0.158        | 3.495        | 0.840        | 0.242        | 3.471        |
| 8        | CNTR                    |              |              |              | 0.695        | 0.163        | 4.255        | 0.946        | 0.270        | 3.504        |
| 9        | Mithila (BPI 3-2)       |              |              |              | 0.605        | 0.152        | 3.989        | 0.896        | 0.242        | 3.702        |

### 3.4. Other characteristics (threshing, storability, market potential etc.):

#### 3.4 Economic returns:

*Market price:* A survey in 2007 of various aromatic and fine grain rice varieties with the rice millers, traders (wholesalers and retailers) and the super markets in Chitwan revealed that Sunaulo Sugandha has established a milled grain price that is 33% higher than Masuli and similar to fine-grained non aromatic Jira Masino and Rato Basmati (Table 15a).

**Table 15a.** Market price of milled rice marketed in 5 kg bags of some leading rice varieties in Naryangadh, Chitwan, September, 2007

| Brand name                                    | Price (Rs./kg) |
|-----------------------------------------------|----------------|
| Shyam Bhog‡                                   | 28             |
| Masuli (Pure Masuli)‡                         | 30             |
| Sugandha Long†                                | 33             |
| Jira Masino‡                                  | 36             |
| <b>Sunaulo Sugandha*</b>                      | <b>40</b>      |
| Rato Basmati (Lalka Basmati- without aroma) ‡ | 45             |
| Rato Basmati (Lalka Basmati)§                 | 48             |
| Supriya Hulas*                                | 52             |
| Arati*                                        | 53             |
| Gauri Basmati*                                | 55             |
| Supriya long*                                 | 55             |
| Premium Basmati*                              | 58             |
| Premium Idli rice (Basmati) *                 | 58             |
| Makhan*                                       | 58             |
| Hulas Basmati*                                | 59             |
| Jasmine (Shahnai Brand) *                     | 74             |

‡Fine grain rice without aroma.

§Has light aroma,

†Indian variety without aroma

\*Aromatic variety

But this is without any promotional effort and in the context that variety is yet to be popular among rice millers, traders and major super markets in the country. In December 2007, a subsequent survey in Chitwan showed that the price advantage of the un-milled rice (paddy) of Sunaulo Sugandha was now 33% higher than that of Masuli. Hence, it is anticipated that in 2008 the price advantage of the milled rice of Sunaulo Sugandha will increase further to values in excess of 33%.

**Table 15b.** Purchase and selling prices (Rs/kg) of unmilled (paddy) rice of Sunaulo Sugandha and Masuli achieved by two seed Producer Groups in Chitwan, December, 2007

| Variety          | Paddy         |         |                 |         | Milled rice   |                           |
|------------------|---------------|---------|-----------------|---------|---------------|---------------------------|
|                  | Shree Ram SPG |         | Dev Ujjawal SPG |         | Shree Ram SPG | Farmer** (Umanath Kandel) |
|                  | Purchase      | Selling | Purchase        | Selling | Selling       | Selling                   |
| Masuli           | 15.50         | 16.50   | 15.50           | 16.50   | 28-32         | 28-30                     |
| Sunaulo Sugandha | 20.00         | 22.00   | 20.00           | 21.00   | 40-60*        | 37-40                     |

\* market price depend on season ( during Dhasain &Tihar the price was highest)

\*\* Umanath Kandel is a farmer growing SS for last four years in 2 ha land and selling paddy and milled rice independently in the market.

#### 4. Morphological characteristics (size, shape, colour, etc):

Traits were measured in 2004 in Gitanagar, Chitwan from a lowland irrigated environment

| Characteristics                  | Value                | Characteristics                    | Value                    |
|----------------------------------|----------------------|------------------------------------|--------------------------|
| <b>4.1. Leaf characteristics</b> |                      | <b>4.4 Panicle characteristics</b> |                          |
| Length (cm)                      | 21.8                 | Length (cm)                        | 28.97                    |
| Width (cm)                       | 1.0                  | Type                               | Intermediate             |
| Blade Pubescence                 | Intermediate         | Secondary branching                | Heavy                    |
| Blade colour                     | Green                | Exertion                           | Well exerted             |
| Basal leaf sheath colour         | Green                | Axis                               | Droopy                   |
| Angle                            | Erect                | Shattering                         | Low (1-5%)               |
| Flag leaf angle                  | Intermediate         | Threshability                      | Intermediate             |
| Leaf senescence                  | Late and slow        | <b>4.5. Grain characteristics</b>  |                          |
| <b>4.2. Ligule Characters</b>    |                      | Awning                             | Awnless                  |
| Length (cm)                      | 2.2                  | Apiculus colour                    | White                    |
| Colour                           | White                | Stigma colour                      | White                    |
| Shape                            | Cleft                | Lemma and palea colour             | Brown                    |
| Collar colour                    | Pale green           | Lemma and palea pubescence         | Hairs on lemma keel      |
| Auricle colour                   | Pale green           | Sterile lemma colour               | Straw (yellow)           |
| <b>4.3. Culm characteristics</b> |                      | Sterile lemma length (mm)          | 0.5                      |
| Length (cm)                      | 103.7                | Spikelet sterility (%)             | Fertile (75-90%)         |
| Number per plant                 | 8                    | Length (mm)                        | 0.98                     |
| Angle                            | Intermediate         | Width (mm)                         | 0.17                     |
| Culm diameter (cm)               | 0.55                 | Length breadth ratio               | 4.0                      |
| Internode colour                 | Green                | Seed coat (bran) colour            | Brown                    |
| Culm strength                    | Strong (non-lodging) | Endosperm type                     | Non-glutinous (non waxy) |
|                                  |                      | Aroma                              | Lightly scented          |

#### 4.1 Major identifying characteristics of a crop variety for its authenticity (distinctness)



Sturdy plants with stay green leaves, erect flag leaf, long panicles, medium fine grains and light golden husk colour.

#### 4.2. Molecular characteristics:

Molecular data do not exist.

### 5. Recommendation domain:

#### 5.1 Agro-ecological zone: Terai and inner terai.

The variety does very well in *terai* (east to west) and inner *terai*. Not formally evaluated in the river basins (however, farmers in the low hills and river basins have already successfully grown this variety). The variety could also be recommended for the river basins of Nepal up to 500 m.

5.2 *Moisture regime*: Rainfed medium land to lowland and irrigated conditions. The variety is bred for medium to semi-deep rainfed and irrigated lowland production environment as classified by IRRI. It is not recommended for deep water conditions.

5.3. Growing seasons and conditions: Main season from May June to October-November. It is best suited for rainfed or irrigated intermediate lowland and medium lands and it is best adapted in irrigated and high input conditions.

#### 5.4 Cropping patterns:

This variety is growing in a number of rice-based cropping patterns from Jhapa to Rupandehi including some of the hilly districts, e.g. Tanahun and Lamjung. The most common patterns where this variety could be grown are as follows:

- Rice-winter vegetables-mungbean or maize or *Chaite* rice, vegetables
- Rice-fallow- mungbean or *Chaite* rice or spring maize
- Rice-potato-maize or *Chaite* rice
- Rice-wheat-fallow
- Rice-mustard-maize or *Chaite* rice or mungbean

5.5 Production and management aspect (please add detailed information on package of practices of this variety that may differ from those recommended for the crop):

### 5.5. Production and management aspects (package of practices)

**5.5.1 Land Preparation:** Farmers customary practice of land preparation is appropriate for this variety.

**5.5.2 Seed rate:** 50-60 kg ha<sup>-1</sup> based on germination percentage.

**5.5.3 Fertilizer application:** From the stability analyses (Figs 1 and 2) it is clear that Sunaulo Sugandha does not differ significantly from Masuli or other commonly grown varieties in its responsive to improved environmental conditions. Many of the farmers that conducted the Mother and Baby trials reported that it is quite responsive to added fertilizers particularly as it is highly resistant to lodging compared with other aromatic varieties and Masuli. Nitrogenous

fertilisers should be given in split doses to reduce any incidence of BLB and also to increase nitrogen use efficiency. Other important aspects of nutrient management in this variety in relation to BLB management and fertiliser use efficiency are as follows:

- Avoid the use of un-decomposed farm yard manure; high dose of nitrogenous fertilisers
- Do not grow this variety close to biogas slurry, compost heap and under shade
- Increase the application of potassium fertilisers

**5.5.4 Seedling age and transplanting time:** Transplant younger seedlings, preferably <20 days old, under controlled irrigation. Because it has similar duration to popular varieties such as Masuli normal farmers' practice can be followed for transplanting time. However, if possible it is advantageous to transplant about 10 days to two weeks earlier than the current planting time to allow for earlier harvesting of the crop and timely planting of winter crops. This also makes sure that delayed transplanting is not done as, like all aromatic varieties, this leads to a higher incidence of insect pests.

**5.5.5 Spacing:** Maintaining specific row to row and plant to plant spacing under manual transplanting may be less practicable. However, make sure to have a minimum of 25 hills per m<sup>2</sup> to get good harvest.

**5.5.6 Irrigation:** This variety prefers alternate wetting and drying conditions to give best yield, i.e. it does very well under controlled irrigation condition. To get best return from this variety the crop should not suffer from drought stress from booting to maturity.

**5.5.7. Disease:** This variety is resistant to leaf and neck blast. Although, a score between 5-7 on a 0-9 scale has been reported for bacterial leaf blight on artificially inoculated condition (Annexure 9-11), it gave very good grain and straw yield performance indicating field tolerance to BLB. Moreover, there are no other aromatic and high quality rice varieties that have lower score of BLB than Sunaulo Sugandha with good combination of yield and quality.

Following management practices can help reduce the incidence of this disease:

- Double rice cropping may increase the disease pressure.
- Diseased rice stubbles, voluntary plants may act as the source of disease inoculum.
- Drain water from the rice paddies in case of disease symptoms in the crop field.
- Treat rice seeds with antibiotic e.g. Streptomycin

**5.5.8. Insect:** Since it has aroma in the standing condition the infestation of stem borer is relatively more which would need to be addressed in time to control the possible loss of grain due to the stem borer attack.

**5.5.9. Intercultural operation:** Two weeding are recommended. The first weeding should be preferably done at 20-30 days after transplanting whereas the second weeding at 60 days after transplanting.

**5.5.10 Harvesting:** Since, it is non-shattering, manual or mechanical harvesting could be done. Farmers practice of harvesting, drying and threshing such as sun drying for 2 days in the field and then manual threshing or by mechanical threshing can be followed.

**5.5.11 Storage:** Sun drying of harvested grain for several days is a common practice in Nepal which could be followed for Sunaulo Sugandha too. To reduce the loss of grains in the storage from moths and weevil, grains should be sufficiently sun dried to bring grain moisture near to 12% before grain is stored in Jute sacks under cool and dry storage.

#### **5.6. Reasons for release:**

- Although a few aromatic and high quality rice landraces are grown in the country, they are low yielding. Not a single modern aromatic and high grain quality of rice is released in Nepal (Jetho Budho, a landrace released in 2006 has very localised adaptation in the areas irrigated with cold water in Pokhara valley and so is unlikely to be widely grown). A large volume of aromatic and high quality rice (worth many millions of rupees) is imported from other countries particularly from India. There is ever increasing demand for aromatic and high quality of rice in the country which can only be fulfilled by developing and recommending suitable modern, high yielding, farmer preferred aromatic and high quality rice varieties for various rice domains in the country.
- Sunaulo Sugandha has a great combination of high yield along with quality traits, e.g. aroma, very good taste and high market price. Unlike many other aromatic varieties, it has sturdy plants and is non-lodging and highly input responsive.
- The variety has similar yield with most popular variety Masuli but has considerably better grain quality and higher market price. Farmers, millers and traders reported that there is a price advantage of at least Rs. 15 per kg for milled rice of Sunaulo Sugandha over Masuli (Table 15). In addition, the agronomic advantage of the variety over Masuli is that it performs extremely well in the low lying *Ghol/Khalla* lands where Masuli does not do well because of lodging problem and excessive blast infestation. This meant that combined added advantage of this variety over Masuli is enormous.
- Preferred by farmers for its ease of threshing.
- It is resistant to blast (leaf and neck), and has field tolerance to bacterial leaf blight (BLB). There are no other aromatic varieties in the rice gene pool of the country which have better disease resistance.
- There are no other aromatic rice varieties with high yield potential, aroma and very good grain quality and good combination of other traits as that of Sunaulo Sugandha. Therefore there is a strong justification to release this variety without any delay to provide the potential benefit from this variety to the numerous farming communities across the country.

#### **5.6.1 Recommendation by VARRC members:**

In the third week of October 2005, near the maturity period of rice crop, a monitoring visit of the members of VARRC was organized for them to see the field performance of Sunaulo Sugandha (Sugandha 2002) and other potential varieties for release e.g. Barkhe 3004 under farmers' management and interact with the farming communities to have first hand information regarding the performance and preference of Sunaulo Sugandha by the farmers. The team also visited the plots of some of the rice varieties proposed by NRRP for release. The team visited several Mother, Baby trials, seed and grain production plots and held discussions with several farmers groups and individual farmers and traders in east and west Chitwan and Nawalparasi. The team members were very positive about the performance of proposed rice varieties. The team after

considering direct observation, farmers and traders interest recommended to submit variety release proposals for three rice varieties developed by LI-BIRD-CAZS-NR and NRRP collaboration, e.g. Sunaulo Sugandha, Barkhe 2014, Barkhe 3004. Of these, Barkhe 3004 has already been released by National Seed Board (NSB) in 2006. Following the recommendation of VARRC, the variety release proposal for Sunaulo Sugandha has been prepared and submitted.

*The Technical Committee of National Seed Board on its decision of 24 December 2007 approved this variety to be proposed to VARRC for final hearing after incorporating all the comments raised by the committee members.*

### 5.6.2 Adoption by the farmers:

Adoption and uptake of this variety was assessed through crop monitoring studies, household level questionnaires and in-depth interviews. Acceptance and uptake of this variety is increasing in rainfed lowland and medium lands and in irrigated high input and good management. Farmers preferred this variety because of its higher grain yield, input responsiveness, non-lodging and less diseases particularly blast and sheath blight. Good milling recovery and higher market price both for rough rice and milled rice make it really attractive option for growing in the low-lying areas replacing Masuli, which is increasingly becoming susceptible to a range of diseases. It is replacing several of the farmers varieties followed by Sabitri, Masuli and Jhapali Masuli. Although, seed distribution of this variety started in 2004 it was not in any significant quantity until 2005. In last three years, a total of over 20 tonne seeds were sold or distributed to farmers in several districts (see seed supply situation below). This amount is adequate to cover about 400 ha of land. This is ignoring seed production and distribution by seed producers groups and farmer-to-farmer spread of a seed which is a minimum of 1:3, i.e. one farmer giving out seeds to at least three farmers. This indicates the variety has already covered considerable area in the terai.

### 6. Seed supply situation:

| Seed category       | Seed quantity (t) |             |           |           | Institution      |
|---------------------|-------------------|-------------|-----------|-----------|------------------|
|                     | 2005              | 2006        | 2007      | Total     |                  |
| Breeder             | 0.5               | 0.5         | 3         | 4         | LI-BIRD, Chitwan |
| Truthfully labelled | 5                 | 8           | 5         | 18        | LI-BIRD, Chitwan |
| Truthfully labelled | 2                 | 2           | 3         | 7         | SRSPG, Chitwan   |
| Truthfully labelled |                   |             | 6         | 6         | NASPG, Jhapa     |
| Truthfully labelled |                   |             | 7         | 7         | KPWSPG, Rautahat |
| Truthfully labelled |                   |             | 2         | 2         | DADO Mahottari   |
| Truthfully labelled |                   |             | 3         | 3         | SBSPG, Bara      |
| Truthfully labelled |                   |             | 5         | 5         | DADO Rupandehi   |
| <b>Total</b>        | <b>7.5</b>        | <b>10.5</b> | <b>34</b> | <b>52</b> |                  |

SRSPG= Shree Ram Seed Producers' Group, NASPG= Nawa Adarsa Seed Producers Group, KPSPG= Krishna Pranami Women Seed Producers Group, SBSPG= Satobhai Seed Producers Group

Both LI-BIRD and NRRP will be responsible for the production of breeder seed as per this joint proposal. LI-BIRD can produce foundation seed, while certified or truthfully labelled seed production can be undertaken by any registered seed producer.

## Proposed by

Signature:

Name: Krishna P Devkota  
Main proposing organisation:  
Local Initiatives for Biodiversity, Research and  
Development (LI-BIRD)  
Designation: Plant Breeder  
Corresponding address:  
P.O. Box 324, Pokhara, Nepal  
  
Tel. 061 526834/532912/535357  
Fax: 061 539956  
Email: [info@libird.org](mailto:info@libird.org)  
Website if applicable: [www.libird.org](http://www.libird.org)

Signature:

Name: Prof J R Witcombe  
Collaborating organization:  
CAZS-Natural Resources, Bangor University  
  
Designation: Director  
Corresponding address:  
CAZS-Natural Resources, Bangor University,  
Gwynedd, LL 57 2UW, UK  
Tel. +44 1248 382116  
Fax: +44 1248 371533  
Email: [j.r.witcombe@bangor.ac.uk](mailto:j.r.witcombe@bangor.ac.uk)  
Website if applicable: [www.cazs.bangor.ac.uk](http://www.cazs.bangor.ac.uk)

Signature:

Name: Dr Ram, B Prasad  
Collaborating organization:  
National Rice Research program (NRRP)  
Designation: Plant Breeder  
Corresponding address:  
Hardinath, Dhanusha, Nepal  
Tel. 041 523000  
Fax: 041  
Email:  
Website if applicable: [www.narc-nepal.org](http://www.narc-nepal.org)

Signature:

Name: Krishna Chapagain  
Collaborating organization:  
Jaskelo Youth Club, Chitwan  
Designation: Collaborator farmer  
Corresponding address:  
Ujwalnagar, Chitwan, Nepal  
Tel. 056 620126  
Fax:  
Email:  
Website if applicable:

## **7. Acknowledgements**

This document is an output from projects R6748, R 7412 and R 8071 funded by Plant Sciences Research Programme of the UK Department for International Development for the benefit of developing countries. The views expressed are not necessarily those of the DFID. Farmers of Chitwan, Nawalparasi and all the other districts of Nepal who directly participated in various activities of COB, Mother, Baby trials, IRD and community-based seed production and distribution and dissemination activities have been duly acknowledged. Special thanks go to District Agriculture Development Offices of all the terai and selected hill districts for collaboration in field research. Staff of LI-BIRD and NRRP and members of Jaskelo Youth Club, who conducted these research activities over a long period, are highly appreciated. We thank Drs D. S. Virk, K.A. Steele and D. Harris of CAZS NR for their help in analysis and interpretation.

## 8. References

- Central Bureau of Statistics (CBS). 2003. Statistical Year Book of Nepal. National Planning Commission Secretariat, HMG/N.
- Chaudhary, B., M. Yadav, RB. Yadav, DK. Chaudhary, PCP. Chaurasiya, RN. Chaudhary, BN. Mahato and DN. Sah. 2004a. Evaluation of rice genotypes for resistance to blast disease. Paper presented in 24<sup>th</sup> Summer Crop Workshop, NARC, Kathmandu.
- Chaudhary, B., M. Yadav, T. Akhtar, RB. Yadav, DB. Gharti and D. Bhandari. 2004b Evaluation of rice genotypes for resistance to bacterial blight. Paper presented in 24<sup>th</sup> Summer Crop Workshop, NARC, Kathmandu.
- FAO, 2004. FAO Statistics Nepal. [<http://www.riceweb.org/countries/nepal.htm>]
- Giri, T.P. and Shahi, B.B. 1978. Performance of aromatic rice varieties in Nepal, pp. 35-36. In: Proceedings of 5th Rice Improvement Workshop, 27 February to 2 March 1978pp. Parwanipur, Nepal: National Rice Improvement Programme, Department of Agriculture, Ministry of Food, Agriculture and Irrigation.
- Gyawali, S., Joshi, K.D. and J R Witcombe 2002. Participatory plant breeding in rice in low altitude production system in Nepal. In: Witcombe J R, Parr L B, Atlin G N (eds.) (2002) Breeding rainfed rice for drought prone environments: Integrating conventional and participatory plant breeding in South and Southeast Asia: Proceedings of a DFID Plant Sciences Research Programme/IRRI Conference, 12-15 March 2002, IRRI, Los Baños, Laguna, Philippines. Department for International Development (DFID) Plant Sciences Research programme (PSP), Centre for Arid Zone Studies (CAZS) and International Rice Research Institute (IRRI), Bangor and Manila.
- IRRI 2005 World rice facts Los Baños, Philippines: International Rice Research Institute.
- IRRI, 2005. World rice facts. International Rice Research Institute. Los Baños, Laguna, Philippines.
- Joshi, K.D, Sthapit, B.R., Vaidya, A., Kadayat, K.B., Tuladhar, J.K., Subedi, K.D. and Lohar, D.P. 1997. Findings of postal survey and rapid rural appraisal on aromatic and fine grain rice in Pokhara valley of Nepal: Issues for future research. LARC Working Paper no. 97/2. Pokhara, Kaski, Nepal: Lumle Agricultural Research Centre.
- M. Joseph, S. Gopalakrishnan, R.K. Sharma, V.P. Singh, A.K. Singh, N.K. Singh and T. Mohapatra (2004) Combining bacterial blight resistance and Basmati quality characteristics by phenotypic and molecular marker-assisted selection in rice. *Molecular Breeding* 13 (4):377-387
- MoAC 2004. Statistical information on Nepalese Agriculture (2003-04). His Majesty's Government of Nepal, Ministry of Agriculture and Cooperatives, Agri-Business Promotion and Statistics Division, Singh Durbar, Kathmandu, Nepal.
- NRRP 1997. *25 years of Rice Research in Nepal (1972-1977)*. Parwanipur Bara, Nepal: National Rice Research Programme, Nepal Agricultural Research Council.
- NRRP, 1997. *25 years of Rice Research in Nepal (1972-1977)*. Parwanipur Bara, Nepal: National Rice Research Programme, Nepal Agricultural Research Council.
- Puri, K.D. and Shrestha, S.M. 2005. Reaction of breeding lines/cultivars of rice against blast (*Magnaporthe grisea*) in field and laboratory conditions. Technical Report submitted to LI-BIRD by a Masters's Degree student at IAAS as a part of Mater's Thesis.
- Rana R B, Joshi K D, Gyawali S and Witcombe J R 2004. Participatory crop improvement project of Chitwan and Nawalparasi districts of Nepal. A baseline report. Discussion Paper no. 5. CAZS Natural Resources and Local Initiatives for Biodiversity, Research and Development (LI-BIRD)
- Sah, R.P. (Ed) 2002. Development of fine and aromatic rice varieties for the hills of Nepal. Final Technical Report, HARP PP-09/99. Pokhara, Kaski, Nepal: Agricultural Research Station, Lumle.
- Snapp, S., 1999. Mother and baby trials: a novel trial design being tried out in Malawi. In TARGET. The Newsletter of the Soil Fertility Research Network for Maize-Based Cropping Systems in Malawi and Zimbabwe. Jan. 1999 issue. CIMMYT, Zimbabwe.
- Steele, K. A., Edwards, G., Zhu, J., and Witcombe, J.R. 2004. *Theor. Appl. Genet.* **109**, 1247

Witcombe J R, Joshi K D, Rana R B and Virk D S 2001. Increasing genetic diversity by participatory varietal selection in high potential production systems in Nepal and India *Euphytica* 122 575-588

### **Annexure 1. Professionals and farmers involved in the development of Sunaulo Sugandha**

| <b>Institutions</b>                                    | <b>Professionals and farmers</b>                                                                                                                                                                                                                                                                                                                                                | <b>Designation</b>                                                                              |
|--------------------------------------------------------|---------------------------------------------------------------------------------------------------------------------------------------------------------------------------------------------------------------------------------------------------------------------------------------------------------------------------------------------------------------------------------|-------------------------------------------------------------------------------------------------|
| LI-BIRD                                                | Mr. KP Devkota, Mr. MP Tripathi, Mr. S Gyawali, , Mr. M Chaudhary, Mr. M Gurung, Mr. Hari Poudel, Mr. K Rawal, Mr. Dev R Karki, Mr. D Poudel, Mr. P Shrestha, Mr. KB Limbu, Mrs R. Kadariya, Mr. N. Chaudhary, Mr. M Subedi, Ms S Sunwar, Ms Durga Pandit, Ms. Parbati Neupane, Mr. Bhim Thanet, Mr. Hari Ghimire, Mr. S Khanal, Mr. B Gadai, Dr. A Subedi and Dr. PK Shrestha, | Plant Breeder, Asst. Plant Breeder, Project Coordinator, Community Organizers, Field Motivators |
| CAZS Natural Resources, University of Wales Bangor, UK | Prof. John R Witcombe, Dr. Krishna D Joshi; Prof. Dr. Daljit Singh Virk                                                                                                                                                                                                                                                                                                         | Plant Breeder, Biometrical Geneticist                                                           |
| NRRP/NARC                                              | Mr. B Chaudhary, Mr. D Chaudhary, Mr. T Akhtar, Dr. N Adhikari, Dr SP Khatiwada, Mr. RB Yadav                                                                                                                                                                                                                                                                                   | Plant Pathologists, Plant Breeders, Agronomists, Plant Breeders, Scientists                     |
| DADO, Chitwan                                          | Mr. Chandra K Devkota, Dr. Suroj Pokhrel, Mr. Mahesh Regmi, Pawan Giri, Ishowari Neupane                                                                                                                                                                                                                                                                                        | Extension Specialists                                                                           |
| IAAS, Rampur                                           | Mr. Krishna Datta Puri, Dipak Sharma Poudel                                                                                                                                                                                                                                                                                                                                     | Lecturer and Plant Pathologist                                                                  |
| DADOs of terai and inner terai districts               | Chitwan, Nawalparasi, Bara, Rautahat, Kailali, Kanchanpur, Dang, Saptari, Dhanusha, Mahottari, Jhapa, Morang, Sunsari, Siraha, Sarlahi, Parsa, Makwanpur, Kapilbastu, Banke, Bardiya, Kaski, Palpa and Baglung.                                                                                                                                                                 | Agronomists, Extension Officers, JT and JTAs                                                    |
| Chitwan                                                | Mr. Dev R Sapkota, Mr. Chudamani Sapkota, Mr. Krishna Chapagain, Mr. Megh Prasad Devkota, Mr. Chirinjibi Pokhrel, Mr. Punya Prasad Adhikari, Krishna Bhatta, Hari Khadka, Mr. Ganga Neupane.                                                                                                                                                                                    | Leader farmers                                                                                  |
| Chitwan                                                | Mr. Dev Raj Sapkota, Mr. Chudamani Sapkota, Mr. Krishna Chapagain, Mr. Deepak Subedi                                                                                                                                                                                                                                                                                            | Jaskelo Youth Club and Dev Ujjal Seed Producers Group                                           |



**Annexure 2.** Coordinated Varietal Trial (CVT)-Rainfed Lowland Medium 2004 and 2006 Yield (kg/ha)

| Genotype               | 2004        |             | Mean        | 2006        |             | Mean        | Grand mean  |
|------------------------|-------------|-------------|-------------|-------------|-------------|-------------|-------------|
|                        | Hardinath   | Parwanipur  |             | Hardinath   | Parwanipur  |             |             |
| Barkhe 2001            | 2912        | 2879        | 2895        |             |             |             | 2895        |
| Barkhe 2014            |             |             |             | 2949        | 2307        | 2673        | 2673        |
| Barkhe 2045            | 1821        | 1094        | 1458        |             |             |             | 1458        |
| Barkhe 3004            | 3470        | 2900        | 3185        |             |             |             | 3185        |
| Barkhe 3019            |             |             |             | 3887        | 1856        | 3016        | 3016        |
| IR 62558-SRN-17-2      | 2488        | 3062        | 2775        |             |             |             | 2775        |
| IR 73435-66            |             |             |             | 2568        | 2119        | 2375        | 2375        |
| IR 73435-83            |             |             |             | 2516        | 3331        | 2865        | 2865        |
| Makwanpur 1            | 3847        | 3432        | 3639        |             |             |             | 3639        |
| <b>Masuli</b>          | <b>3187</b> | <b>2479</b> | <b>2833</b> |             | <b>1927</b> | <b>1927</b> | <b>2586</b> |
| NR 1190-24-4-2         | 3357        | 3166        | 3261        |             |             |             | 3261        |
| NR 1887-4-3-1-1        | 2579        | 1483        | 2031        |             |             |             | 2031        |
| NR 1887-81-1-2-2       | 3023        | 2973        | 2998        |             |             |             | 2998        |
| NR 1887-8-1-1-2-2      |             |             |             | 3625        | 1748        | 2821        | 2821        |
| NR 1892-20-21-1-1      | 2814        | 3160        | 2987        |             |             |             | 2987        |
| NR 1893-17-2-3         | 3090        | 3126        | 3108        | 3682        | 2178        | 3037        | 3075        |
| NR 1894-10-3-2-3       | 3225        | 3103        | 3164        | 3664        | 3036        | 3395        | 3272        |
| NR 1988-2-3-5          |             |             |             | 2732        | 2377        | 2580        | 2580        |
| NR 1988-9-1-2-4-3      |             |             |             | 3111        | 1727        | 2518        | 2518        |
| NR 1988-9-1-2-4-4      |             |             |             | 2428        | 1932        | 2215        | 2215        |
| NR 268-4-6-4           | 2430        | 3247        | 2839        |             |             |             | 2839        |
| PSBRC 70               | 2129        | 2008        | 2068        |             |             |             | 2068        |
| Radha 11               |             |             |             |             | 2048        | 2048        | 2048        |
| Radha 4                |             |             |             | 4058        |             | 4058        | 4058        |
| Rambilas               | 2955        | 2478        | 2716        | 3463        |             | 3463        | 2965        |
| <b>Sunaulo Suganda</b> | <b>2620</b> | <b>2704</b> | <b>2662</b> | <b>4112</b> | <b>2101</b> | <b>3250</b> | <b>2936</b> |
| Super 3004             |             |             |             | 3436        | 2933        | 3220        | 3220        |
| WAR 120-1-5            |             |             |             | 3111        | 1848        | 2570        | 2570        |
| WITA 4                 |             |             |             | 3060        | 2957        | 3016        | 3016        |
| Grand mean             | 2872        | 2706        | 2789        | 3275        | 2277        | 2847        | 2816        |
| LSD (p=0.05)           | 998         | 534         | Ns          | 1057        | 926         | 997         |             |
| p level                | 0.023       | <0.001      | 0.101       | 0.023       | 0.015       | ns          |             |

Annexure 3. Yield (t ha<sup>-1</sup>) performance of Sunalulo Sugandha in Mother trials in low land environment of Chitwan and Nawalparasi, 2004 to 2006

| Genotype      | 2004  | 2005   | 2006   | Grand mean |
|---------------|-------|--------|--------|------------|
| Barkhe 3004   | 3.011 | 4.241  | 3.968  | 3.920      |
| Barkhe 3015   | 1.917 |        |        | 1.917      |
| Barkhe 3017   | 2.102 | 2.552  |        | 2.417      |
| Barkhe 3018   |       | 4.284  | 4.071  | 4.159      |
| Barkhe 3019   |       | 4.662  | 4.249  | 4.419      |
| Masuli        | 2.481 | 3.315  | 3.280  | 3.172      |
| NR 1190       |       |        | 3.575  | 3.575      |
| Sugandha 2002 | 3.197 | 3.782  | 3.138  | 3.372      |
| Super 3004    | 4.419 | 4.221  | 4.138  | 4.209      |
| Grand mean    | 2.855 | 3.865  | 3.774  | 3.686      |
| LSD (p=0.05)  | 1.37  | 0.72   | 0.503  |            |
| p level       | 0.02  | <0.001 | <0.001 |            |

*Note: Data from 3, 7 and 10 mother trials in 2004, 2005 and 2006 respectively in Chitwan and Nawalparasi districts*

Annexure 4. Yield (t ha<sup>-1</sup>) performance of Sunalulo Sugandha in aromatic Mother trials in Chitwan and Nawalparasi, 2006

Table: Mean performance of Sunalulo Sugandha in aromatic mother trials in Chitwan and Nawalparasi districts during main season 2006 and 2007 (n=9)

| Genotype         | Maturity (days) | Tillers (no/hill) | Plant height(cm) | Grain yield (t ha <sup>-1</sup> ) |
|------------------|-----------------|-------------------|------------------|-----------------------------------|
| Barkhe 3019      | 151.40          | 8.91              | 106.0            | 3.59                              |
| Lalka Basmati    | 159.60          | 7.77              | 141.2            | 2.04                              |
| Masuli           | 152.33          | 6.97              | 134.0            | 2.87                              |
| Sunaulo Sugandha | 155.67          | 6.73              | 110.0            | 3.57                              |
| Super 3004       | 152.33          | 9.07              | 106.2            | 3.74                              |
| Grand mean       | 3.762           | 7.89              | 119.5            | 3.16                              |
| F test           | **              | **                | **               | **                                |
| CV (%)           | 3.5             | 26.6              | 9.0              | 39.9                              |
| LSD              | 154.27          | 0.944             | 4.08             | 0.891                             |

**Annexure 5.** Agronomic traits of Sunaulo Sugandha and other main season rice varieties in CVT rainfed lowland medium (RLM) in Hardinath, Parawanipur and Itahari since 2004-2006 and mother trial data from the trials conducted by LI-BIRD, FORWARD and CDRC in Jhapa (5), Morang (3), Sunsari (5), Saptari (6), Siraha (5), Chitwan (26), Nawalparasi (15) and Kapilbastu (3) from 2004 to 2006.

| Genotype                      | No. of trials |           |           |           | Days to heading |            |            | Days to maturity |            |            |            | Plant height |            |            |            |
|-------------------------------|---------------|-----------|-----------|-----------|-----------------|------------|------------|------------------|------------|------------|------------|--------------|------------|------------|------------|
|                               | 2004          | 2005      | 2006      | Total     | 2005            | 2006       | Mean       | 2004             | 2005       | 2006       | Mean       | 2004         | 2005       | 2006       | Mean       |
| Barkhe 2001                   | 23            |           |           | 23        |                 |            |            | 129              |            |            | 129        | 115          |            |            | 115        |
| Barkhe 2014                   | 11            | 20        | 21        | 52        | 121             | 112        | 118        | 136              | 148        | 144        | 143        | 123          | 112        | 106        | 112        |
| Barkhe 2024                   | 10            | 12        | 12        | 34        |                 |            |            | 140              | 144        | 141        | 141        | 100          | 102        | 87         | 96         |
| Barkhe 3004                   | 19            | 18        | 10        | 47        | 111             |            | 111        | 155              | 156        | 155        | 155        | 98           | 95         | 96         | 96         |
| Barkhe 3019                   | 1             | 10        | 17        | 28        | 71              | 125        | 98         | 149              | 153        | 155        | 154        | 93           | 102        | 100        | 101        |
| BPI-3-2                       |               | 12        | 4         | 16        |                 |            |            |                  | 141        | 140        | 140        |              | 103        | 96         | 101        |
| CNTR                          |               | 8         |           | 8         |                 |            |            |                  | 116        |            | 116        |              | 96         |            | 96         |
| Gajale Masino                 |               |           | 17        | 17        |                 |            |            |                  |            | 153        | 153        |              |            | 153        | 153        |
| IR 62558-SRN-17-2             | 12            |           |           | 12        |                 |            |            | 148              |            |            | 148        | 99           |            |            | 99         |
| Jhapali Masuli                |               | 16        | 15        | 31        | 108             |            | 108        |                  | 142        | 144        | 143        |              | 113        | 106        | 110        |
| Lalka Basmati                 |               |           | 15        | 15        |                 |            |            |                  |            | 159        | 159        |              |            | 144        | 144        |
| <b>Masuli</b>                 | <b>15</b>     | <b>24</b> | <b>18</b> | <b>57</b> | <b>126</b>      | <b>116</b> | <b>123</b> | <b>150</b>       | <b>152</b> | <b>150</b> | <b>151</b> | <b>132</b>   | <b>125</b> | <b>124</b> | <b>125</b> |
| NR 1190                       |               | 12        | 10        | 22        |                 |            |            |                  | 145        | 152        | 149        |              | 139        | 131        | 135        |
| NR 1190-24-4-2                | 12            |           |           | 12        |                 |            |            | 142              |            |            | 142        | 121          |            |            | 121        |
| NR 1887-4-3-1-1               | 12            |           |           | 12        |                 |            |            | 142              |            |            | 142        | 143          |            |            | 143        |
| NR 1887-81-1-2-2              | 12            |           |           | 12        |                 |            |            | 144              |            |            | 144        | 100          |            |            | 100        |
| NR 1887-8-1-1-2-2             |               | 8         | 7         | 15        | 117             | 111        | 115        |                  | 149        | 147        | 148        |              | 107        | 111        | 109        |
| NR 1892-20-21-1-1             | 12            |           |           | 12        |                 |            |            | 150              |            |            | 150        | 87           |            |            | 87         |
| NR 1893-17-2-3                | 12            | 8         | 7         | 27        | 129             | 119        | 126        | 150              | 162        | 148        | 155        | 87           | 88         | 110        | 97         |
| NR 1894-10-3-2-3              | 12            | 8         | 7         | 27        | 132             | 123        | 129        | 159              | 164        | 154        | 159        | 99           | 107        | 116        | 110        |
| NR 268                        |               |           | 14        | 14        |                 |            |            |                  |            | 149        | 149        |              |            | 125        | 125        |
| NR 268-4-6-4                  | 12            |           |           | 12        |                 |            |            | 147              |            |            | 147        | 126          |            |            | 126        |
| OR 367                        |               | 12        | 14        | 26        |                 |            |            |                  | 143        | 145        | 144        |              | 100        | 85         | 93         |
| PSBRC 70                      |               | 8         | 3         | 11        |                 |            |            | 158              |            |            | 158        | 90           |            |            | 90         |
| Radha 17                      | 17            | 8         | 15        | 40        |                 |            |            | 149              |            |            | 149        | 126          |            |            | 126        |
| Rambilas                      | 11            |           | 3         | 14        | 140             |            | 140        | 152              | 167        | 154        | 159        | 109          | 114        | 106        | 110        |
| Sabitri                       | 17            | 7         | 1         | 25        |                 |            |            | 139              |            | 140        | 139        | 103          |            | 98         | 102        |
| <b>Sunaulo Sugandha Super</b> | <b>7</b>      | <b>10</b> | <b>17</b> | <b>34</b> | <b>72</b>       | <b>120</b> | <b>96</b>  | <b>152</b>       | <b>153</b> | <b>153</b> | <b>153</b> | <b>111</b>   | <b>112</b> | <b>101</b> | <b>107</b> |
| 3004                          |               |           | 7         | 7         | 74              | 123        | 99         | 156              | 152        | 153        | 154        | 109          | 104        | 101        | 103        |

**Contd.**

| Genotype              | Panicle length (cm) |           |           |           |
|-----------------------|---------------------|-----------|-----------|-----------|
|                       | 2004                | 2005      | 2006      | Mean      |
| Barkhe<br>2001        |                     |           |           |           |
| Barkhe<br>2014        |                     | 21        | 24        | 22        |
| Barkhe<br>2024        |                     |           |           |           |
| Barkhe<br>3004        | 24                  | 23        |           | 23        |
| Barkhe<br>3019        | 24                  | 24        | 26        | 25        |
| BPI-3-2               |                     |           |           |           |
| CNTRLR                |                     |           |           |           |
| Gajale                |                     |           |           |           |
| Masino                |                     |           |           |           |
| IR 62558-<br>SRN-17-2 |                     |           |           |           |
| Jhapali               |                     |           |           |           |
| Masuli                |                     | 21        |           | 21        |
| Lalka                 |                     |           |           |           |
| Basmati               |                     |           |           |           |
| <b>Masuli</b>         |                     | <b>22</b> | <b>24</b> | <b>23</b> |
| NR 1190               |                     |           |           |           |
| NR 1190-<br>24-4-2    |                     |           |           |           |
| NR 1887-<br>4-3-1-1   |                     |           |           |           |
| NR 1887-<br>81-1-2-2  |                     |           |           |           |
| NR 1887-<br>8-1-1-2-2 |                     | 22        | 22        | 22        |
| NR 1892-<br>20-21-1-1 |                     |           |           |           |
| NR 1893-<br>17-2-3    |                     | 22        | 25        | 23        |
| NR 1894-<br>10-3-2-3  |                     | 23        | 27        | 24        |
| NR 268                |                     |           |           |           |
| NR 268-<br>4-6-4      |                     |           |           |           |
| OR 367                |                     |           |           |           |
| PSBRC<br>70           |                     |           |           |           |
| Radha 17              |                     |           |           |           |
| Rambilas              |                     | 21        |           | 21        |
| Sabitri               |                     |           |           |           |
| <b>Sunaulo</b>        |                     |           |           |           |
| <b>Sugandha</b>       | <b>26</b>           | <b>26</b> | <b>28</b> | <b>27</b> |
| Super                 |                     |           |           |           |
| 3004                  | 23                  | 23        | 25        | 24        |

**Cont.**

| Genotype                | Filled grains | Unfilled grains | 1000 grain weight (g) |           |           | Tillers/hill |           |          |          |
|-------------------------|---------------|-----------------|-----------------------|-----------|-----------|--------------|-----------|----------|----------|
|                         | /5 panicles   | /5 panicles     | 2004                  | 2005      | Mean      | 2004         | 2005      | 2006     | Mean     |
| Barkhe 2001             |               |                 | 21                    |           | 21        | 9            |           |          | 9        |
| Barkhe 2014             | 533           | 167             |                       | 22        | 22        | 9            | 10        | 9        | 9        |
| Barkhe 2024             |               |                 |                       |           |           | 10           | 9         | 8        | 9        |
| Barkhe 3004             | 435           | 221             | 23                    | 24        | 24        | 8            | 10        | 10       | 9        |
| Barkhe 3019             |               |                 | 22                    |           | 22        |              | 9         | 10       | 10       |
| BPI-3-2                 |               |                 |                       |           |           |              | 10        | 7        | 9        |
| CNTLR                   |               |                 |                       |           |           |              | 9         |          | 9        |
| Gajale Masino           |               |                 |                       |           |           |              |           | 8        | 8        |
| IR 62558-SRN-17-2       |               |                 | 26                    |           | 26        |              |           |          |          |
| Jhapali Masuli          | 661           | 151             |                       | 17        | 17        |              | 9         | 9        | 9        |
| Lalka Basmati           |               |                 |                       |           |           |              |           | 8        | 8        |
| <b>Masuli</b>           | <b>740</b>    | <b>187</b>      | <b>17</b>             | <b>18</b> | <b>18</b> | <b>7</b>     | <b>7</b>  | <b>9</b> | <b>8</b> |
| NR 1190                 |               |                 |                       |           |           |              | 8         | 8        | 8        |
| NR 1190-24-4-2          |               |                 | 24                    |           | 24        |              |           |          |          |
| NR 1887-4-3-1-1         |               |                 | 19                    |           | 19        |              |           |          |          |
| NR 1887-81-1-2-2        |               |                 | 19                    |           | 19        |              |           |          |          |
| NR 1887-8-1-1-2-2       | 449           | 263             |                       | 20        | 20        |              |           |          |          |
| NR 1892-20-21-1-1       |               |                 | 21                    |           | 21        |              |           |          |          |
| NR 1893-17-2-3          | 587           | 232             | 22                    | 22        | 22        |              |           |          |          |
| NR 1894-10-3-2-3        | 536           | 240             | 27                    | 26        | 26        |              |           |          |          |
| NR 268                  |               |                 |                       |           |           |              |           | 8        | 8        |
| NR 268-4-6-4            |               |                 | 18                    |           | 18        |              |           |          |          |
| OR 367                  |               |                 |                       |           |           |              | 10        | 9        | 9        |
| PSBRC 70                |               |                 | 28                    |           | 28        |              |           |          |          |
| Radha 17                |               |                 |                       |           |           | 6            |           |          | 6        |
| Rambilas                | 586           | 266             | 20                    | 19        | 19        |              |           |          |          |
| Sabitri                 |               |                 |                       |           |           | 9            |           | 8        | 9        |
| <b>Sunaulo Sugandha</b> | <b>840</b>    |                 | <b>19</b>             |           | <b>19</b> | <b>8</b>     | <b>10</b> | <b>8</b> | <b>8</b> |
| Super 3004              |               |                 | 23                    |           | 23        | 9            | 10        | 12       | 10       |

**Cont.**

| Genotype                | Tillers/m <sup>2</sup> |            |            | Mean       |
|-------------------------|------------------------|------------|------------|------------|
|                         | 2004                   | 2005       | 2006       |            |
| Barkhe 2001             | 281                    |            |            | 281        |
| Barkhe 2014             |                        | 263        | 271        | 267        |
| Barkhe 2024             |                        |            |            |            |
| Barkhe 3004             | 293                    | 250        |            | 259        |
| Barkhe 3019             | 288                    | 288        | 290        | 289        |
| BPI-3-2                 |                        |            |            |            |
| CNTLR                   |                        |            |            |            |
| Gajale Masino           |                        |            |            |            |
| IR 62558-SRN-17-2       | 288                    |            |            | 288        |
| Jhapali Masuli          |                        | 306        |            | 306        |
| Lalka Basmati           |                        |            |            |            |
| <b>Masuli</b>           | <b>286</b>             | <b>262</b> | <b>231</b> | <b>259</b> |
| NR 1190                 |                        |            |            |            |
| NR 1190-24-4-2          | 260                    |            |            | 260        |
| NR 1887-4-3-1-1         | 210                    |            |            | 210        |
| NR 1887-81-1-2-2        | 309                    |            |            | 309        |
| NR 1887-8-1-1-2-2       |                        | 269        | 251        | 260        |
| NR 1892-20-21-1-1       | 291                    |            |            | 291        |
| NR 1893-17-2-3          | 294                    | 258        | 283        | 272        |
| NR 1894-10-3-2-3        | 293                    | 253        | 285        | 271        |
| NR 268                  |                        |            |            |            |
| NR 268-4-6-4            | 230                    |            |            | 230        |
| OR 367                  |                        |            |            |            |
| PSBRC 70                | 247                    |            |            | 247        |
| Radha 17                |                        |            |            |            |
| Rambilas                | 318                    | 267        | 269        | 278        |
| Sabitri                 |                        |            |            |            |
| <b>Sunaulo Sugandha</b> | <b>277</b>             | <b>284</b> | <b>266</b> | <b>272</b> |
| Super 3004              | 295                    | 295        | 262        | 274        |

**Annexure 6.** Grain yield (t ha<sup>-1</sup>) of Sunaulo Sugandha from crop cut survey of Baby trials from various districts of Nepal, 2006

| Region        | District   | N   | Farmer's variety                                                                               | Farmer's variety <sup>†</sup> | Sunaulo Sugandha <sup>†</sup> | Yield advantage over farmer's variety (%) | t-at 0.05 |
|---------------|------------|-----|------------------------------------------------------------------------------------------------|-------------------------------|-------------------------------|-------------------------------------------|-----------|
| Central Terai | Chitwan    | 54  | Barkhe 2014, Barkhe 3004, BG 1442, Makawanpur 1, Masuli, OR 367, Sabitri, Samba Masuli, Swarna | 3.99 ± 0.17                   | 4.31 ± 0.18                   | 8                                         | *         |
|               | Makawanpur | 7   | Makawanpur 1                                                                                   | 3.09 ± 0.20                   | 3.39 ± 0.17                   | 10                                        | *         |
|               | Rupandehi  | 3   | Gorakhnath 509, Masuli, Radha 4                                                                | 4.03 ± 0.33                   | 3.57 ± 0.65                   | -11                                       | NS        |
|               | Mean       | 62  |                                                                                                | 3.80 ± 0.15                   | 4.09 ± 0.16                   | 7.45                                      | *         |
| Eastern Terai | Mahotari   | 3   | Not available                                                                                  | 3.50 ± 0.35                   | 5.50 ± 0.13                   | 57                                        | ***       |
|               | Morang     | 9   | Basmati, Kanchhi Masuli, Masuli                                                                | 3.58 ± 0.24                   | 3.89 ± 0.22                   | 9                                         | NS        |
| Hilly area    | Mean       | 12  |                                                                                                | 3.56 ± 0.19                   | 4.30 ± 0.27                   | 21                                        | *         |
|               | Lamjung    | 15  | Chhote, Ekle, Khumal-4, Madhesi, Pahele, Pokhrela Masino, Sabitri                              | 3.22 ± 0.15                   | 4.71 ± 0.23                   | 46                                        | ***       |
|               | Tahanun    | 2   | Madhesi, Masuli                                                                                | 3.75 ± 0.75                   | 3.1250 ± 0.12                 | -17                                       | NS        |
|               | Udayapur   | 10  | Bans Dhan, Basmati, Dumsi, Harda, Kalo Basmati, Khemti, Masuli, Radha 12                       | 1.82 ± 0.27                   | 2.50 ± 0.15                   | 38                                        | ***       |
|               | Mean       | 27  |                                                                                                | 2.74 ± 0.19                   | 3.77 ± 0.25                   | 38                                        | ***       |
|               | Grand mean | 101 |                                                                                                | 3.55 ± 0.20                   | 4.09 ± 0.12                   | 15                                        | ***       |

<sup>†</sup>Mean ± SE

**Annexure 7.** Various rice varieties being replaced by Sunaulo Sugandha in 8 districts (as mentioned in Annexure 6) of Nepal.

| Variety replacing     | Frequency | Variety replacing | Frequency |
|-----------------------|-----------|-------------------|-----------|
| Farmers varieties     | 41        | Pokhrela          | 2         |
| Sabitri               | 28        | Radha 12          | 2         |
| Masuli                | 19        | Barkhe 2001       | 1         |
| OR 367                | 12        | Barkhe 3004       | 1         |
| Aus Masuli (Bansdhan) | 9         | Chaite 2          | 1         |
| Radha 4               | 7         | Dumsi             | 1         |
| Barkhe 2014           | 4         | Ekle              | 1         |
| Basmati               | 4         | Gorakhnath 509    | 1         |
| Sona Masuli           | 4         | Harda             | 1         |
| Madeshe               | 3         | Himali            | 1         |
| Pahele                | 3         | Jarneli           | 1         |
| Samba Masuli          | 3         | Khemti            | 1         |
| Swarna                | 3         | Khumal 4          | 1         |
| BG 1442               | 2         | Makawanpur 1      | 1         |
| Kalo Basmati          | 2         | Total             | 160       |

**Annexure 8.0** Cost-benefit analysis of Sunaulo Sugandha and Masuli Based on CVT, Mother and Baby trial yield data

| <b>Cost items</b>                                       | <b>Sunaulo Sugandha</b> | <b>Masuli</b>   |
|---------------------------------------------------------|-------------------------|-----------------|
| <b>Expenditure on cultural operations (Labour cost)</b> |                         |                 |
| Nursery seed bed preparation                            | 400                     | 400             |
| Fertilizer N, P and K for nursery bed                   | 125                     | 125             |
| Land preparation                                        | 3640                    | 3640            |
| Fertilizer /Manure application                          | 500                     | 500             |
| Transplanting                                           | 3000                    | 3000            |
| Weeding                                                 | 3000                    | 3000            |
| Insecticide/pesticide spraying                          | 600                     | 600             |
| Harvesting                                              | 3000                    | 3000            |
| Threshing                                               | 2500                    | 2500            |
| Cleaning, packaging                                     | 1250                    | 1250            |
| <b>Subtotal</b>                                         | <b>18015</b>            | <b>18015</b>    |
| <b>Expenditure on inputs</b>                            |                         |                 |
| Seed                                                    | 1100                    | 1100            |
| Fertilizer                                              |                         |                 |
| DAP                                                     | 2349                    | 2349            |
| UREA                                                    | 1735.92                 | 1735.92         |
| MOP                                                     | 900                     | 900             |
| Micro-nutrient                                          | 1000                    | 300             |
| Fungicide                                               | 500                     | 500             |
| Insecticide                                             | 1000                    | 500             |
| <b>Sub-total</b>                                        | <b>8584.92</b>          | <b>7384.92</b>  |
| <b>Total cost</b>                                       | <b>26599.92</b>         | <b>25399.92</b> |
| <b>Return</b>                                           |                         |                 |
| Grain <sup>§</sup>                                      | 68580                   | 43810           |
| Straw                                                   | 11875                   | 11875           |
| <b>Total return</b>                                     | <b>80455</b>            | <b>55685</b>    |
| <b>Net profit</b>                                       | <b>53855.08</b>         | <b>30285.08</b> |
| <b>Benefit cost ratio</b>                               | <b>2.025</b>            | <b>1.192</b>    |

<sup>§</sup> Average grain yield of Sunaulo Sugandha from 58 trials in CVT (n=11), mother trials (n=20) and baby trials (n=101) data.

**Annexure 9.** National Rice Disease Nurseries for blast, 2003.

| <b>EN</b>  | <b>DESIGNATION</b>                | <b>Leaf blast score (0-9)</b> |               |              |               |
|------------|-----------------------------------|-------------------------------|---------------|--------------|---------------|
|            |                                   | <b>NRRP/H</b>                 | <b>NORP/N</b> | <b>PPD/K</b> | <b>RARS/T</b> |
| 24         | CNTLR85085-78-1-1-1               | 0                             | 1             | 1            | 0             |
| 36         | Rato Basmati                      | 0                             | 1             | 2            | 1             |
| 170        | BPI 3-2                           | -                             | 1             | 2            | 0             |
| <b>226</b> | <b>Barkhe-3004</b>                | <b>0</b>                      | <b>1</b>      | <b>2</b>     | <b>0</b>      |
| 232        | Sugandha-1                        | 0                             | 1             | 1            | 0             |
| 233        | Sugandha-2002                     | -                             | 1             | 2            | 1             |
|            | <i>Laxmi (Resistant Check)</i>    | <i>1</i>                      |               |              |               |
|            | <i>Masuli (Susceptible Check)</i> | <i>9</i>                      |               |              |               |

Source: Chaudhary *et al.*, 2004.



**Annexure 10.** National Rice Disease Nurseries for blast and bacterial leaf blight, 2004.

| Variety                      | 2004  |     | 2005  |     |
|------------------------------|-------|-----|-------|-----|
|                              | Blast | BLB | Blast | BLB |
| Sugandha 2002                |       | 3   | 0     | 7   |
| Sugandha 1                   |       |     | 0     | 7   |
| CNTRLR 85033-9-3-1-1         | 0     | 7   |       |     |
| CNTRLR85085-78-1-1-1         | NG    | 7   |       |     |
| Rato Basmati                 | 0     | 5   |       |     |
| Pusa sugandha-2              | 0     | 9   |       |     |
| Gan-wan-xian 22              | 0     | 3   |       |     |
| Pusa 834                     | 0     | 3   |       |     |
| Resistant Check (Laxmi)      | 1     |     | 1     |     |
| Resistant Check (??)         |       | 3   |       | 2   |
| Susceptible Check (Masuli)   | 8     |     | 8     |     |
| Susceptible Check (Masuli??) |       | 9   |       | 9   |

**Source: Bedananda et al, 2005.**

NRRP/H= National Rice Research Program, Hardinath; NG=Not germinated; PG=Poor germination

**Annexure 11.** Incidence and average blast scores in rice varieties screened in the PVS trials in Chitwan, 2005

| Rice variety  | Leaf blast score (0-9) <sup>§</sup> |           | Neck blast score (0-9) | Severity/incidence |            |
|---------------|-------------------------------------|-----------|------------------------|--------------------|------------|
|               | Krishna Mandir                      | Gitanagar | Krishna Mandir         | Leaf blast         | Neck blast |
| Sugandha 2002 | 2                                   | 1         | †                      | No/low             | †          |
| Masuli        | 5                                   | 6         | 4                      | High               | High       |
| Barkhe 3004   | 1                                   | 1         | †                      | No/low             | †          |

<sup>§</sup> Leaf and neck blast scoring was done using IRRI Standard Evaluation System (SES) for rice in 0-9 scale, mean of three replicates. For neck blast on the basis of severity of infection on panicle, 0 = no incidence, 1 = <1%, 3 = 1-5%, 5-6 = 25%, 7 = 26-50%, 9 = 51-100%. For severity, varieties are categorised as no = zero infection, low = predominance of 1-3 score and low severity, moderate = 4-6 and high = 7-9, † = information not available.

Source: Puri and Shrestha 2005

**Annexure 12.** Response of Sunaulo Sugandha and Masuli to rice insects observed in mother trials in on-farm trials in Chitwan in 2003 in Chitwan district by plant pathologist from IAAS, Rampur, Chitwan

| Trial       | Masuli |   |   | Suanulo Sugandha |   |   |
|-------------|--------|---|---|------------------|---|---|
|             | 1      | 2 | 3 | 1                | 2 | 3 |
| Mealy bug   | 2      | 1 | 0 | 3                | 1 | 0 |
| Stem borer  | 0      | 0 | 1 | 0                | 0 | 0 |
| Leaf folder | 0      | 0 | 1 | 0                | 0 | 0 |
